# Supplementary material for: Antitumor activity and selectivity of a nanostructured peroxo polyoxoniobate
Source: Royal Society of Chemistry journal article supplement (doi:10.1039/d5tb00396b), 2025-01-01
Supplement: d5tb00396b1.pdf [file d5tb00396b1.pdf]

# 1 ANTITUMOR ACTIVITY AND SELECTIVITY OF A 2 NANOSTRUCTURED PEROXO POLYOXONIOWATE

3 Luiz C. A. Oliveira<sup>a\*</sup>, Cinthia C. Oliveira<sup>a\*\*</sup>, Samuel M. Breder<sup>a</sup>, Klaus Krambrock<sup>a</sup> Poliane  
4 Chagas<sup>a</sup>, Ana P. Heitmann<sup>a</sup>, Estella G. da Mota<sup>a</sup>, José B. Gabriel<sup>a</sup>, Jadson C. Belchior<sup>a</sup>, Leonardo A.  
5 De Souza<sup>b</sup>, Tiago H. Ferreira<sup>c</sup>, Sued E. M. Miranda<sup>c</sup>, André L. B. Barros<sup>c</sup>, Cynthia L. M. Pereira<sup>a</sup>,  
6 Vinícius D. N. Bezzon<sup>e</sup>, Fábio F. Ferreira<sup>f</sup>.

7  
8 <sup>a</sup> Universidade Federal de Minas Gerais, Departamento de Química, Av. Antônio Carlos 6627, Belo Horizonte-  
9 MG, 31270-901, Brazil.

10 <sup>b</sup> Universidade do Estado do Rio de Janeiro, Instituto de Química, Departamento de Química Geral e  
11 Inorgânica, Rua São Francisco Xavier 524, Rio de Janeiro-RJ, 20550-013, Brazil.

12 <sup>c</sup> Universidade Federal de Minas Gerais, Faculdade de Farmácia, Av. Antônio Carlos 6627, Belo Horizonte-  
13 MG, 31270-901, Brazil.

14 <sup>d</sup> Departamento de Física, Centro de Ciências Exatas, Universidade Federal do Espírito Santo (UFES), Campus  
15 Goiabeiras, Vitória - ES, CEP 29075-910, Brazil.

16 <sup>e</sup> Departamento de Física, Instituto de Ciências Exatas e Biológicas, Universidade Federal de Ouro Preto,  
17 Campus Universitário Morro do Cruzeiro, Ouro Preto - MG, CEP 35402-136, Brazil.

18 <sup>f</sup> Centro de Ciências Naturais e Humanas (CCNH), Universidade Federal do ABC (UFABC), Av. dos Estados  
19 5001, Santo André, SP, 09210-580, Brazil.

20

21

22

23

24

25

26

27

28

29

30

31

32

33

34 Corresponding author phone: +55 31 3409-7550

35 \*lcao@ufmg.br

37

## 38 SUPPORTING INFORMATION

39

40 PONb structure (Figure S1a) has five different types of oxygen atoms: five bridging atoms  $\mu_2$   
 41  $-O$ , two bridging hydroxyls  $\mu_2-OH$ , six terminal oxygens  $\eta-O$ , four terminal protonated peroxides  
 42  $\eta-OOH$  and two terminal deprotonated peroxides  $\eta-OO^-$  bound to the central atoms Nb(V). The  
 43 Nb(V) atom in crystal lattices of the PONb monomer has a coordination number from 5 to 7, as  
 44 observed for other polyoxoniobates types reported in the literature<sup>1-3</sup>. B3LYP/LanL2Dz/6-31G(d,p)  
 45 (gas phase) optimized geometries of the PONb and MB monomers, and the PONb-MB system are  
 46 shown in Figure S2.

47

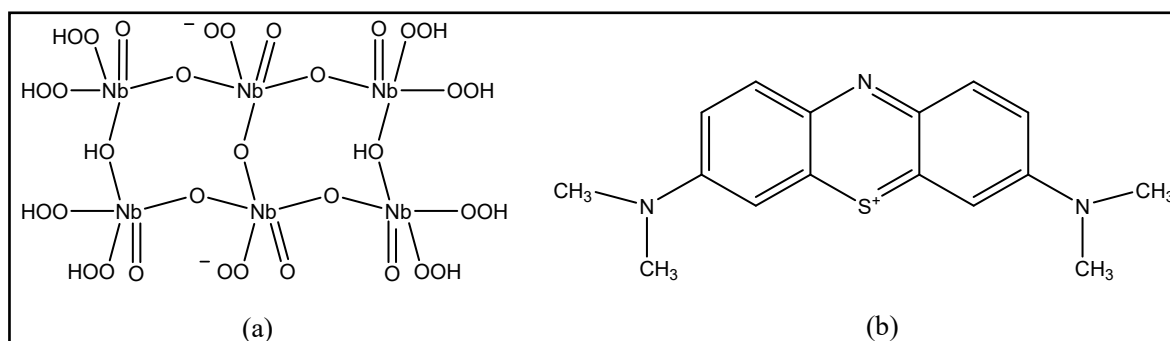

48  
 49 **Figure S1.** Chemical structure of the proposed Polyoxoniobate model ( $[H_{10}Nb_6O_{13}(O_2)_{10}]^{2-}$ )(a) and  
 50 the methylene blue dye (b).

51

52

53

54

55

56

57

58

59

60

61

62

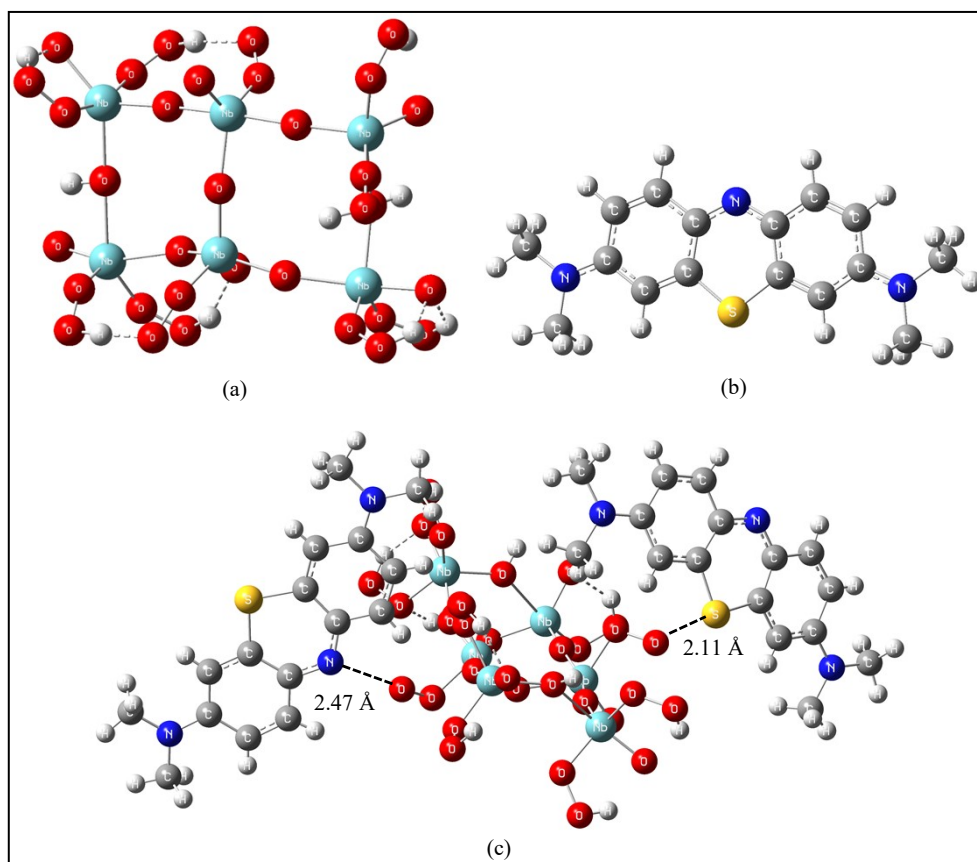

**Figure S2.** B3LYP/LanL2Dz/6-31G(d,p) fully optimized structures of PONb (a), MB (b) and PONb-MB system (c).

63 The transitions that contribute the most to the calculated bands (Figures S1b and c) occur  
 64 between the molecular orbitals highlighted in Table S1. Other contributions (less than 10%) are also  
 65 present and refer to transitions between innermost molecular orbitals of difficult interpretations.  
 66 Except for the HOMO-2 orbital (Figure S1d), the LUMO+5 orbital (Figure S3a) is evenly distributed  
 67 along the PONb surface. This indicates the potential interaction sites that would affect the calculated  
 68 absorption band at 287 nm (red line in Figure 1b) for the PONb model proposed. The isosurface  
 69 predominance of the orbitals in the protonated and deprotonated peroxide groups highlights these  
 70 regions as potential interaction sites of PONb with proton and electron acceptor chemical species,  
 71 respectively, such as the MB molecule. HOMO orbital (Figure S3b) region located in the heterocyclic  
 72 ring of MB molecule that interacts through its N atom with PONb monomer may destabilize the

intermolecular interaction. The interaction between PONb and the S atom (heterocyclic ring) of the MB molecule stabilizes the intermolecular interaction in the PONb-MB system (see the circled region in Figure S3b). These results agree with the intermolecular distances calculated at about 2.47 Å (PONb—N-MB) and 2.11 Å (PONb—S-MB), Figure S2c.

77

**Table S1.** Transition energy, oscillator force ( $f$ ) and main contributions to the UV-Vis bands calculated at B97D/LanL2Dz/6-31G(d,p) for PONb, MB and PONb-MB system.

| Structures | Wavelength / nm | Transition Energy / eV | $f$   | Contribution          |
|------------|-----------------|------------------------|-------|-----------------------|
| PONb       | 287             | 4.33                   | 0.227 | HOMO-2 → LUMO+5 (61%) |
|            | 216             | 5.75                   | 0.199 | HOMO-2 → LUMO+1 (67%) |
| MB         | 267             | 4.76                   | 0.763 | HOMO-1 → LUMO+1 (49%) |
|            |                 |                        |       | HOMO → LUMO+2 (35%)   |
|            | 524             | 2.36                   | 0.993 | HOMO → LUMO (71%)     |
| PONb-MB    | 550             | 2.21                   | 0.739 | HOMO → LUMO+3 (60%)   |

80

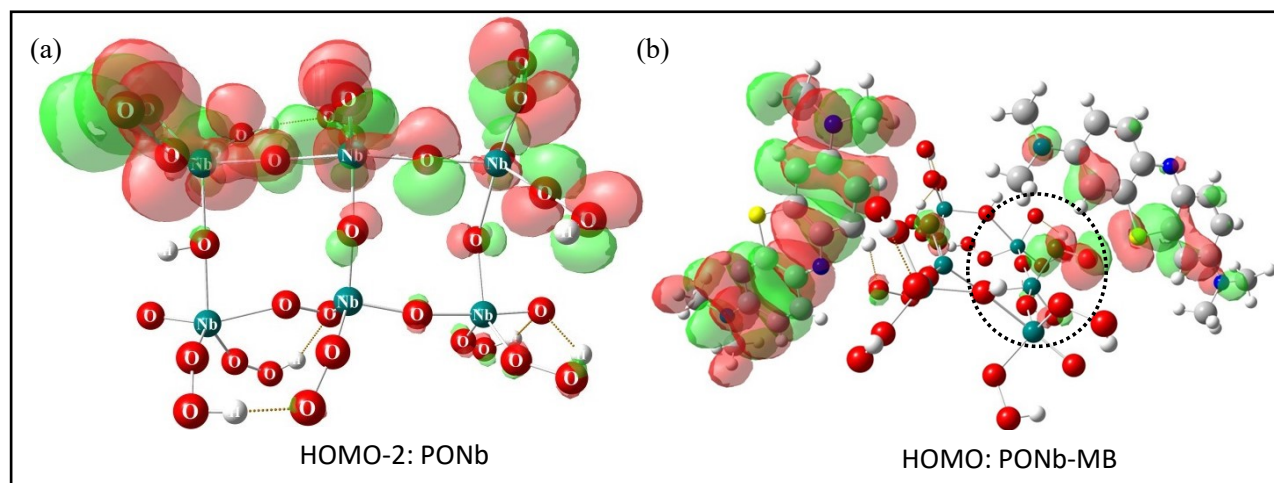

81

**Figure S3.** LUMO+5 and HOMO orbitals calculated at B97D/LanL2Dz/6-31G(d,p) (PCM-Water) level for isolated PONb (a) and PONb-MB system (b).

84

The formation energy of the PONb-MB system,  $\Delta E_F$ , was calculated as:

$$\Delta E_F = E_{\text{PONb-MB}} - (E_{\text{PONb}} + 2E_{\text{MB}}) \quad (\text{S1})$$

86

87 In which  $E_{PONb-MB}$ ,  $E_{PONb}$  and  $E_{MB}$  correspond to the total energy of the PONb-MB, isolated  
 88 PONb, and MB fully optimized structures, respectively. The enthalpy ( $\Delta H_F$ ) and Gibbs free energy  
 89 of formation ( $\Delta G_F$ ) for PONb-MB system were calculated according to Equations S2 and S3, where  
 90  $\Delta H_T$  and  $T\Delta S$  are respectively the thermal correction to enthalpy and entropy contribution evaluated  
 91 using standard statistical thermodynamic formulae<sup>4</sup>. All calculated parameters are shown in Table  
 92 S2.

$$\Delta H_F = \Delta E_F + \Delta H_T \quad (S2)$$

$$\Delta G_F = \Delta H_F + T \Delta S \quad (S3)$$

99 **Table S2.** Thermodynamic parameters calculated at B3LYP/LanL2Dz/6-31G(d,p) level (p =1 atm, T  
 100 =298.15 K) for the PONb-MB system. All values in units of kcal mol<sup>-1</sup>.

| Structure | $\Delta E_F$ | $\Delta H_T$ | $T \Delta S$ | $\Delta H_F$ | $\Delta G_F$ |
|-----------|--------------|--------------|--------------|--------------|--------------|
| PONb-MB   | -55.0        | -8.4         | -26.3        | -63.4        | -37.1        |

102 Infrared (IR) and Raman spectra (Figure S4) were calculated at B3LYP/LanL2Dz/6-31G(d,p)  
 103 level for the PONb and MB monomers, and the PONb–MB system. In our harmonic frequency  
 104 calculations, the influence of possible interactions between PONb–PONb or two PONb–MB systems  
 105 on band shifts were not considered, since it is a quite demanding computational task. Nevertheless,  
 106 the main normal modes were assigned and are shown in Table S3. In the IR spectrum of isolated  
 107 PONb (Figure S4a), we can highlight the following bands: (i) –O–O stretching of  $\eta$ –OOH groups in  
 108 the range 1200-1350 cm<sup>-1</sup>; (ii) –Nb–O stretching of  $\eta$ –O groups in the range 750-900 cm<sup>-1</sup> and (iii) –  
 109 Nb–OH stretching of  $\mu_2$ –OH groups in de 550 cm<sup>-1</sup> (very low-intensity). In the Raman spectrum for  
 110 isolated PONb (Figure S4d) are found the low-intensity bands of the –O–O<sup>-</sup> stretching of the  
 111 deprotonated peroxide ligands in the region of 1230 cm<sup>-1</sup>. The formation of the PONb–MB system

112 slightly shifts the bands relative to the free  $\text{--O--O--}$  stretching to the high-energy region of the Raman  
113 spectrum. This band shifts from  $1230\text{ cm}^{-1}$  (isolated PONb) to about  $1250\text{--}1300\text{ cm}^{-1}$  (PONb-MB).  
114 Simultaneous  $\text{--O--O--}$  (PONb) and  $\text{--C--N / --C--S}$  (MB) stretches are observed in the low-energy region  
115 in the range  $745\text{--}800\text{ cm}^{-1}$  (Table S3) in the IR and Raman spectra. These results indicate that there  
116 is an established interaction between the PONb and MB monomers to form a PONb-MB compound.

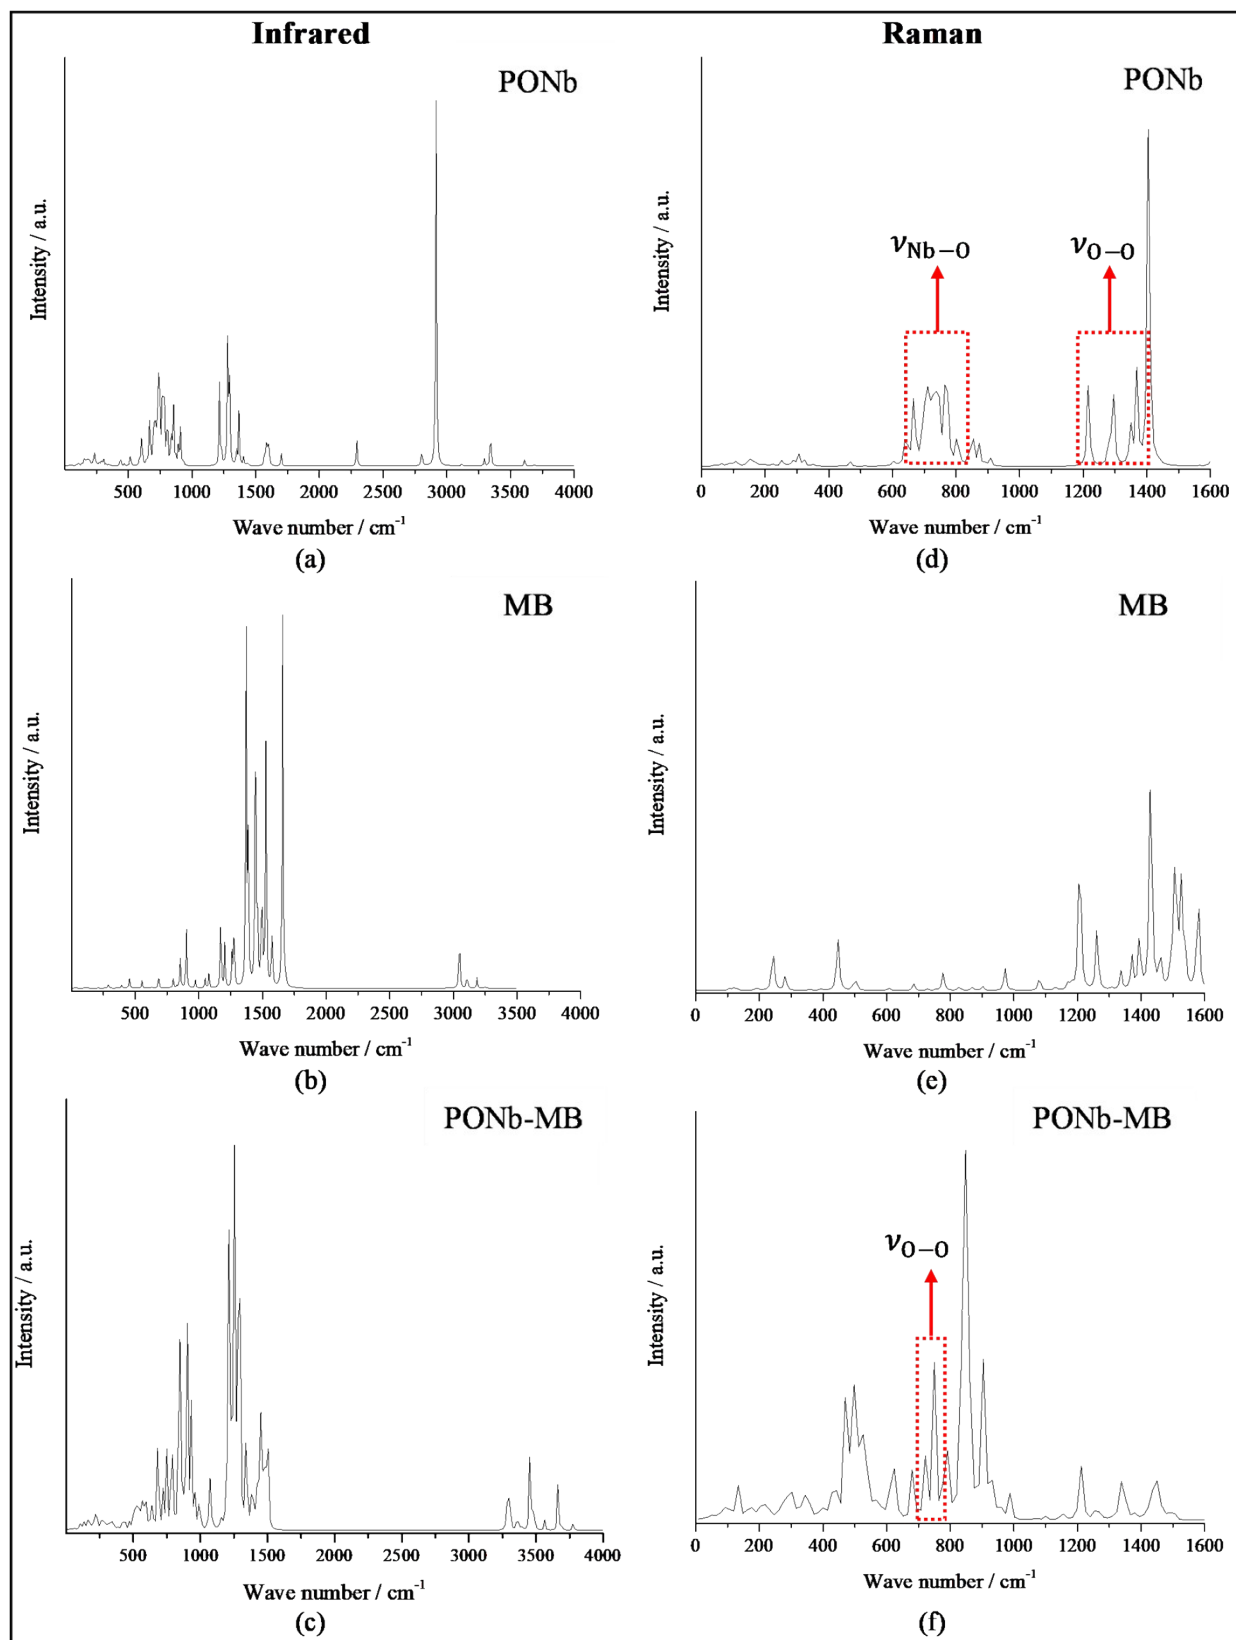

117  
 118 **Figure S4.** Simulation of the IR and Raman spectra calculated at B3LYP/LanL2Dz/6-31G(d,p) for  
 119 PONb, MB, and PONb–MB system. The main absorption bands are described in Table S3. In (b) and  
 120 (f), the highlighted theoretical Raman bands are in good agreement with the experimental results.

121

122

**Table S3.** B3LYP/LanL2DZ/6-31G(d,p) vibrational frequencies (in  $\text{cm}^{-1}$ ) and Raman-IR assignments for PONb, MB, and PONb–MB systems. The assignments of the modes highlighted are in good agreement with experimental results\*.

| Structures          | Vibrational assignments                                                          | IV / $\text{cm}^{-1}$ | Raman / $\text{cm}^{-1}$ |
|---------------------|----------------------------------------------------------------------------------|-----------------------|--------------------------|
| <b>PONb</b>         | $\nu_{\text{O-H}}$                                                               | 3900-2750             | 3200-2900                |
|                     | $\nu_{\text{O-O}}$ (protonated peroxides) *                                      | 1350-1200             | 1400-1280*               |
|                     | $\nu_{\text{O-O}}$ (deprotonated peroxides) *                                    | -                     | 1230*                    |
|                     | $\nu_{\text{Nb-O}}$ *                                                            | 900-750               | 800-680*                 |
| <b>MB</b>           | $\nu_{\text{C-H}}$ ( $\text{CH}_3$ group)                                        | -                     | 3250-3000                |
|                     | $\nu_{\text{C-C}}$ (aromatic)                                                    | 1690                  | -                        |
|                     | $\nu_{\text{C-N}}$ (heterocycle)                                                 | -                     | 1680                     |
|                     | $\delta_{\text{CH}_2}$ ( $\text{CH}_3$ group)                                    | 1500                  | -                        |
|                     | $\nu_{\text{C-C}}$ (heterocycle)                                                 | 1430                  | -                        |
| <b>PONb-<br/>MB</b> | $\nu_{\text{O-H}}$                                                               | 3650-3550             | 3650-3550                |
|                     | $\nu_{\text{C-H}}$ ( $\text{CH}_3$ group)                                        | 3500-3250             | -                        |
|                     | $\nu_{\text{C-N}}$ (heterocycle)                                                 | 1270                  | -                        |
|                     | $\nu_{\text{O-O}}$ (free protonated peroxides)                                   | -                     | 1300-1250                |
|                     | $\nu_{\text{O-O}}$ (deprotonated peroxides) / $\nu_{\text{C-N}}$ (heterocycle) * | 800                   | 770*                     |
|                     | $\nu_{\text{O-O}}$ (deprotonated peroxides) / $\nu_{\text{C-S}}$ (heterocycle) * | 745                   | 746*                     |

vs: very strong; s: strong; m: medium; w: weak, vw: very weak, v: stretching;  $\delta$ : angular deformation.

In the Raman spectrum of the PONb, a peak at  $585 \text{ cm}^{-1}$  and a broad band around  $680 \text{ cm}^{-1}$  can be seen, which are usually associated to oxygen-hexacoordinated Nb in a distorted octahedral. In addition, there is an intense and well-defined peak at  $878 \text{ cm}^{-1}$ , characteristic of Nb-peroxo species formed from the addition of hydrogen peroxide to niobium oxide <sup>5</sup>. The bands related to PONb appear shifted in the Raman spectrum of the PONb-MB material, due to the presence of MB bound to the structure, evidenced in Figure S10. These properties further support the existence of chemical bond between the dye and the niobium complex to form PONb-MB.



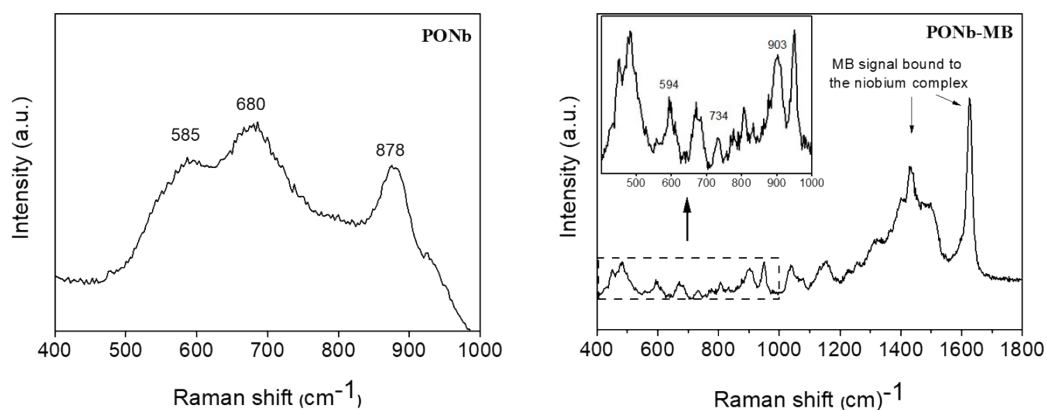

135

136 **Figure S5:** RAMAN spectrum for PONb and PONb-MB.

137

138 The structural characterization of the compounds was further investigated by X ray powder  
 139 diffraction. The main objective here was the comparison of the PONb structure after lyophilization  
 140 and its precursor, *i.e.*, the precipitated niobium oxyhydroxide<sup>6,7</sup>, thus proving that we have a new  
 141 structure called PONb.

142 Figure S6a presents the structure functions for lyophilized PONb and Nb<sub>2</sub>O<sub>5</sub>. There are some  
 143 differences in PONb S(Q), especially in the regions from 2.2 to 3.0 Å<sup>-1</sup>, 3.0 to 3.2 Å<sup>-1</sup>, and between  
 144 4.2 to 8.0 Å<sup>-1</sup>. The Fourier Transform of these results yielded the PDF pattern for the samples, shown  
 145 in Figure S5b. As can be seen, the main correlations (atomic pair distances) are maintained up to 4 Å  
 146 for both samples. The PONb G(r) has a higher intensity than the other, which can be related to the  
 147 higher Hydrogen and Oxygen amount in its structure, yielding a high coordination factor for these  
 148 atoms in the local structure. Probably, the main local structure where Nb is bonded to O is maintained.  
 149 Based on the distances calculated up to 10 Å using the Bond\_Str software, and based on the Nb<sub>2</sub>O<sub>5</sub>  
 150 CIF file, it is possible to infer some correlations observed in the PDF patterns (S6b). Considering the  
 151 calculated distances, correlations up to 2 Å can be related to Nb-O pairs; distances between 2 and 3  
 152 Å can be O-O, and distances between 3.2 and 4.0 Å can be associated with Nb-Nb nearest neighbor  
 153 atoms.

154 It is worth noting that PONb G(r) has higher well-structure correlations further 4 Å, *i.e.*, the  
 155 correlation peaks have higher intensity as well as well-defined peaks, compared to Nb<sub>2</sub>O<sub>5</sub>. This can

156 be associated with a better-organized medium-order structure for this sample, while the  $\text{Nb}_2\text{O}_5$   
 157 preserves most of the local structure (low-order). Therefore, it is possible to infer that the synthesized  
 158 PONb presents a unique and different crystalline structure than the  $\text{Nb}_2\text{O}_5$ . The PONb linked to MB  
 159 species generates the PONb-MB structure.

160

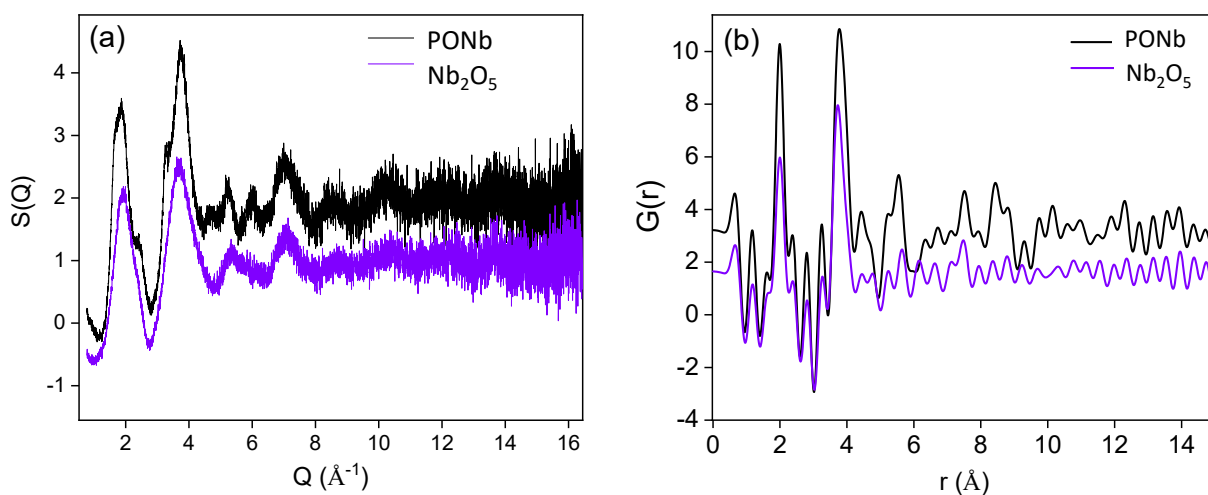

161

162 **Figure S6.** Structure function (a) and PDF patterns ( $G(r)$ ) for PONb after lyophilization and its  
 163 precursor, the  $\text{Nb}_2\text{O}_5$  (b).

164

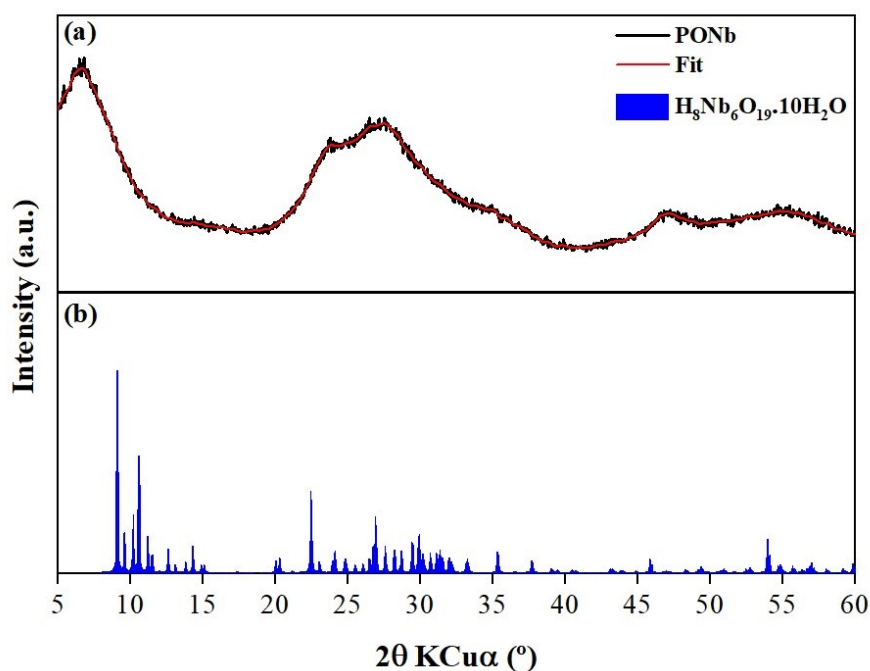

165

166 **Figure S7.** XRD of polyoxoniobate after solvent evaporation (a) and the phase identification using  
167 the Powder Diffraction File (PDF) database (JCPDS, International Center for Diffraction Data) (b).

168

169 The UV-Vis spectra, shown below, indicate the presence of the compounds even in the  
170 presence of the culture media, attesting to their stability.

171

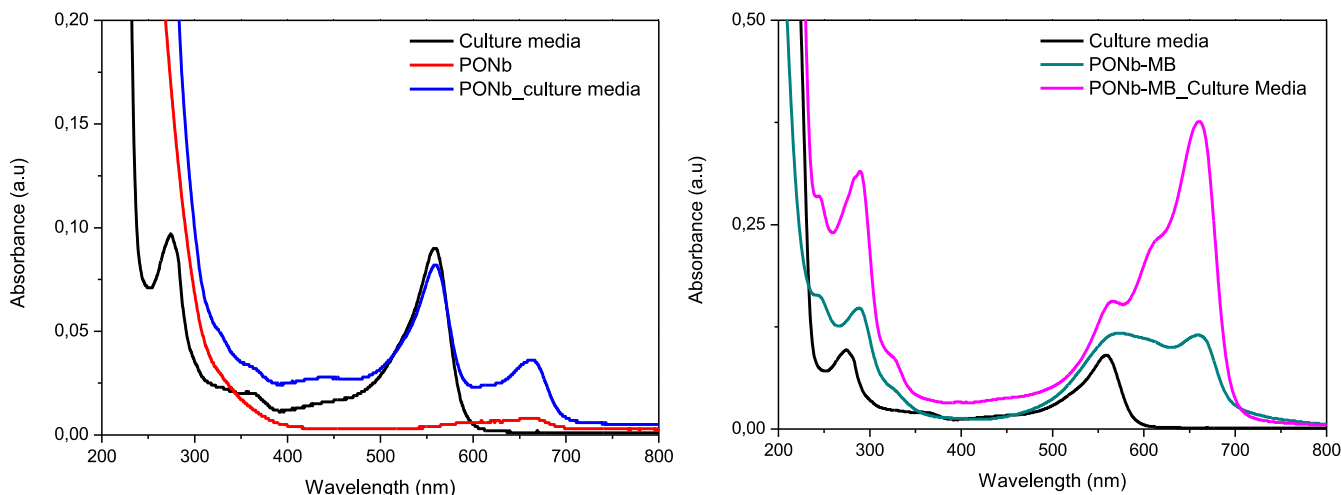

172

173 **Figure S8.** UV-Vis spectra in the presence of the culture media.

174

175 The PONb and PONb-MB compounds are organized in clusters. Through DLS (diffuse light  
176 scattering) analysis, it was possible to infer the size of these particles. As expected, the results  
177 obtained (Figure X) showed that PONb-MB has a larger particle size (660 nm) when compared to  
178 PONb (568 nm), since MB is coupled to the structure.

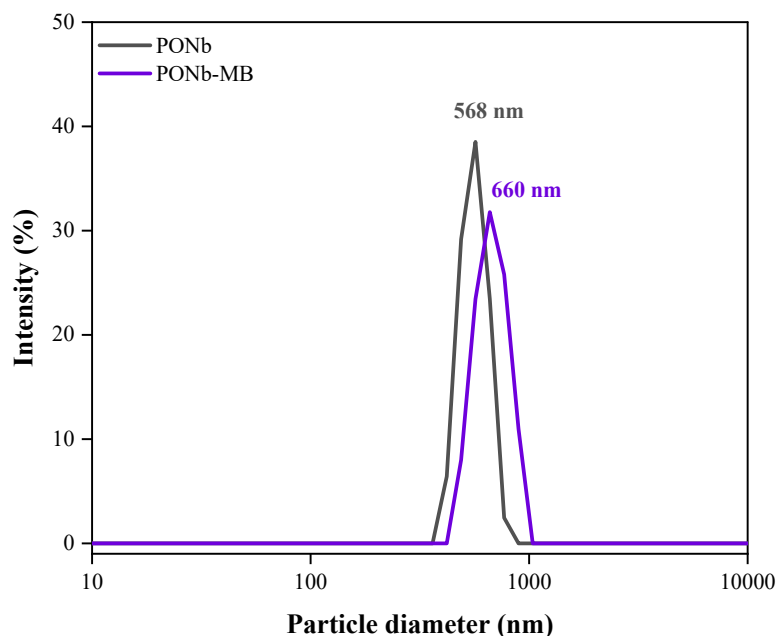

**Figure S9:** Particle size distribution to PONb band PONb-MB.

## REFERENCES

- 1 J. Geng, Q.; Liu, Q.; Ma, P.; Wang, J.; Niu, *Dalt. Trans*, 2014, **43**, 9843–9846.
- 2 E.-B. Si, Y.-L.; Wang, *Mol. Phys*, 2009, **107**, 1521–1526.
- 3 C. Deblonde, G. J. P.; Coelho-Diogo, C.; Chagnes, A.; Cote, G.; Smith, M. E.; Hanna, J. V.; Iuga, D.; Bonhomme, *Inorg. Chem.*, 2016, **55**, 5946–5956.
- 4 D. A. McQuarrie, *Statistical Thermodynamics*, University Science Books, Mill Valey, 1973.
- 5 Ziolek, M., Sobczak, I., *Catal. Today*, 2017, **285**, 211–225.
- 6 H. W. P. Esteves, A.; Oliveira, L.C.A.; Ramalho, T.C.; Gonçalves, M.; Anastácio, A. S.; Carvalho, *Catal. Commun*, 2008, **10**, 330–338.
- 7 P. Chagas, H. S. Oliveira, R. Mambrini, M. Le Hyaric, M. V. De Almeida and L. C. A. Oliveira, *Appl. Catal. A Gen.*, 2013, **454**, 88–92.
